# Supplementary material
Source: PubMed Central journal article supplement (PMC7350987)
Supplement: ASN.2020040520SupplementaryData.pdf [file ASN.2020040520SupplementaryData.pdf]

## **Supplemental Figures**

### **Disaster Response to the COVID-19 Pandemic for Patients with Kidney Disease in New York City**

The Division of Nephrology, Columbia University Vagelos College of Physicians and Surgeons,  
New York, NY

#### **TABLE OF CONTENT**

**Supplemental Figure 1**

**Supplemental Figure 2**

**Supplemental Figure 3**

**Supplemental Figure 4**

**Supplemental Figure 5**

**Supplemental Figure 1.** Composition of the crisis team (large oval). The team communicated with members of the divisions, the department of medicine leadership and workgroups, hospital leadership, and external vendors and agencies.

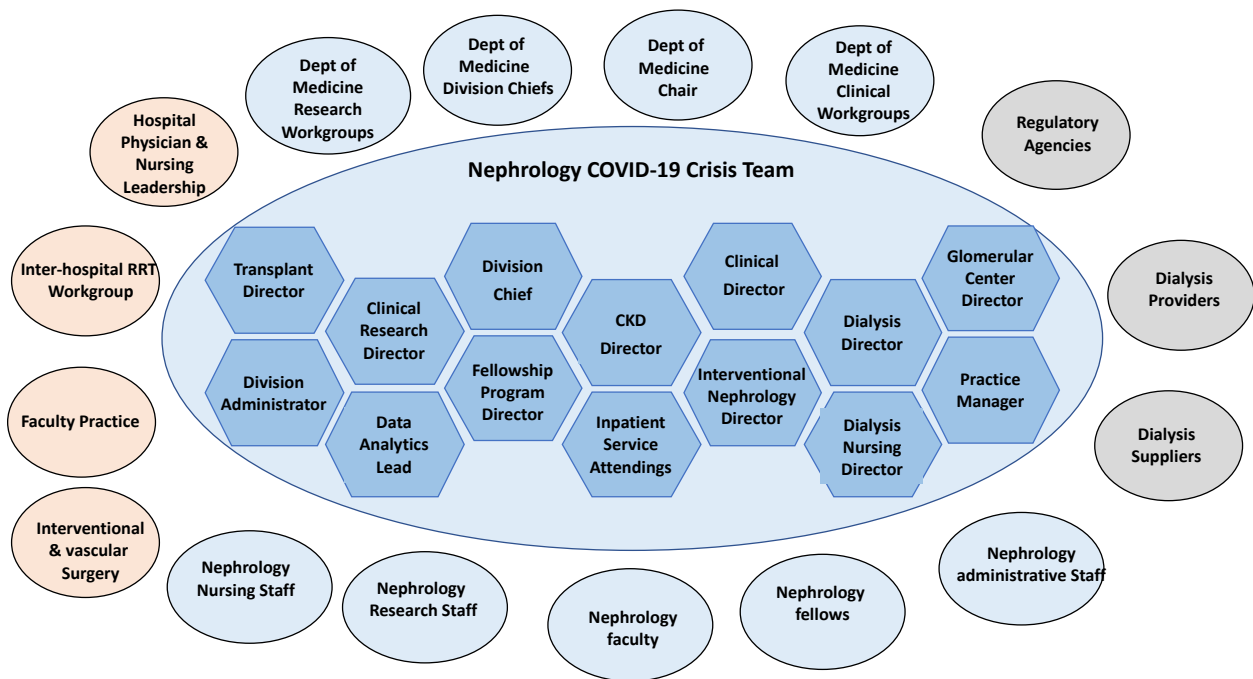

## Supplemental Figure 2:

### Divisional Renal Replacement Therapy Resource Utilization Dashboard

Real-time census growth is tracked based on daily logging of individual census counts by service. The dashboard breaks down counts and growth from the prior day by service, campus, COVID status, and modality of RRT (CRRT and HD). Percent of census that is COVID+ is represented in a yellow bar graph for each service, campus, and modality type to assist with divisional planning of resource allocation. Cells automatically turn green if there is a decrease in census from the prior day, turn light red if within the forecasted growth, and dark red if the growth is exceeding the projected growth rate.

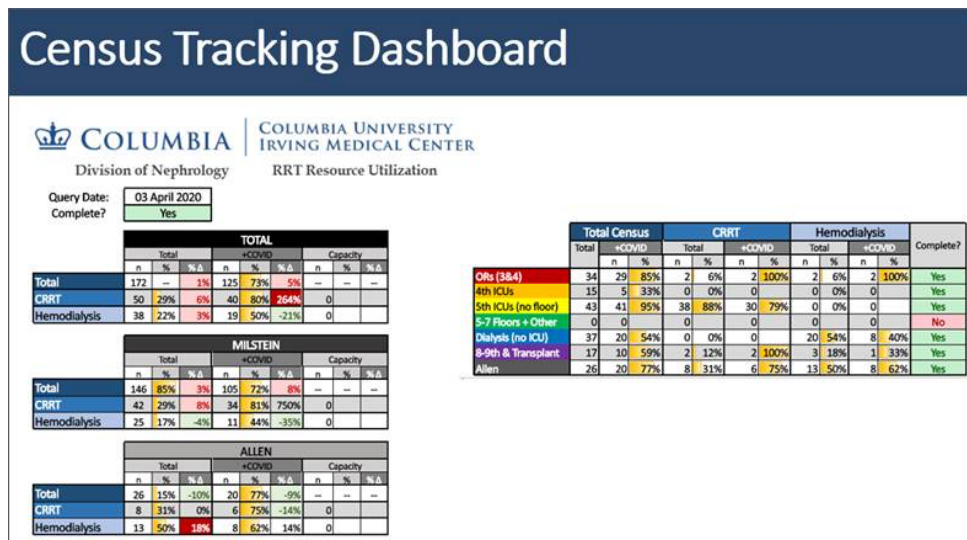

### Supplemental Figure 3

#### *Projected growth vs. Actual census growth*

We projected census growth based on the daily growth rate of nephrology services between March 24-29 at Milstein hospital., which conformed to a ~ 10% daily growth rate. We projected the census for the nephrology service (dashed blue line), CCRT census (dashed orange line) and hemodialysis service (dashed green line) at Milstein hospital. The solid lines show the actual observed numbers on our services at Milstein hospital. The Y-axis shows the number of patients. The X-axis shows the date.

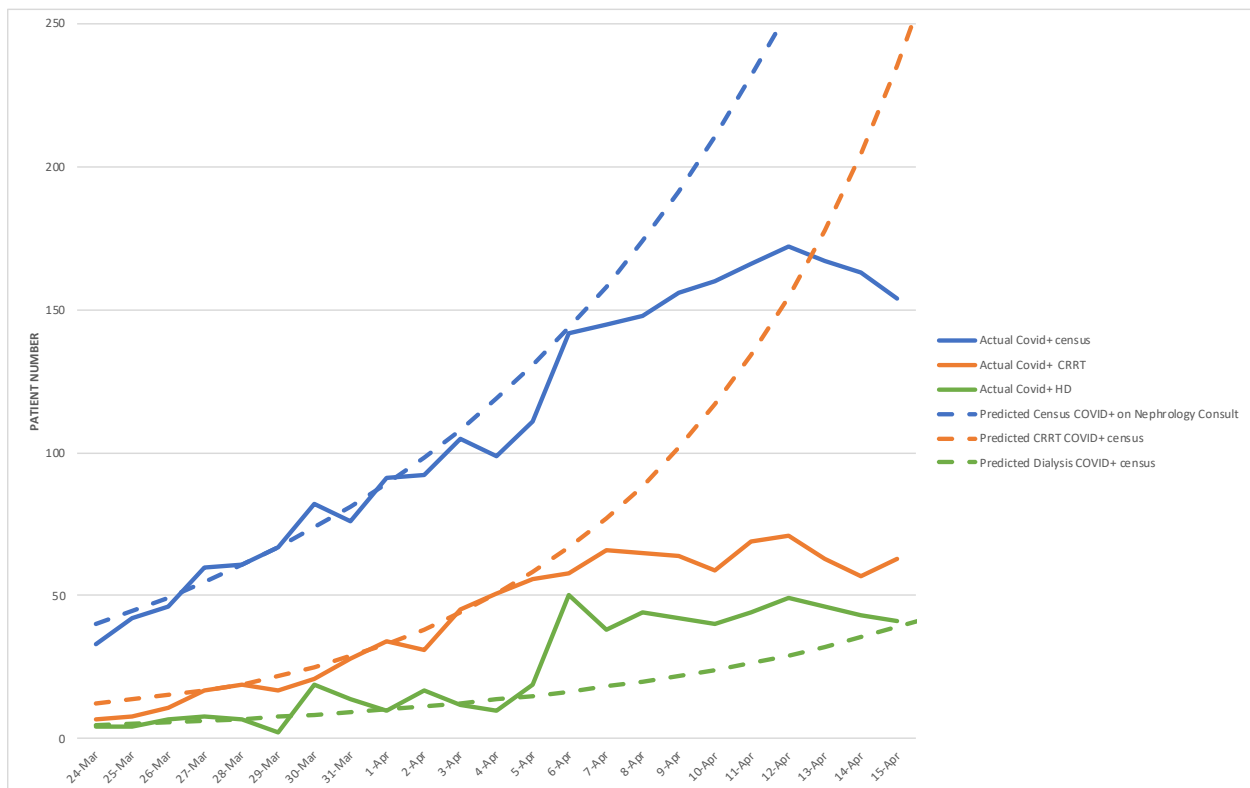

## CRRT Sharing Protocol Tool

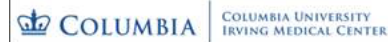

## Supplemental Figure 5:

### *Dialysate Conservation Protocol*

In order to reduce waste of partially used dialysate bags, we developed a dosing nomogram in order to round to a bag of dialysate rather than a set weight. While this is important for all patients, it is imperative to use this approach when using the sharing CRRT machine protocol as many bags would still be partially full at the end of their 22-hour CRRT session. Using the patient's weight by rows and a given default dosing strategy by columns (based on the projected number of days of dialysate supply we have remaining), the nephrologist is able to determine how many bags of dialysate per patient per day should be used, and eliminates the waste from partially full bags at the end of a PIRRT session.

|                                        | Bags of Fluid per Day                                                                                                                                                                                                                                                                                                                                                                                                                                                                                                                                                                                                                                                                                                              | Hourly Dialysate Rate |                 |                 |      |      |  |  |  |  |    |      |    |      |    |             |    |   |   |    |    |    |    |   |    |    |    |    |    |    |    |    |    |    |    |    |    |    |    |    |    |    |    |    |    |    |     |    |    |    |    |    |                                                                                                                                                                                                                                                                                                                                                                                                                                                                                                                                                                                                                                                                                                                                                                                            |  |  |                 |  |  |  |  |  |  |    |      |    |      |    |             |    |      |      |      |      |      |    |      |      |      |      |      |    |      |      |      |      |      |    |      |      |      |      |      |    |      |      |      |      |      |     |      |      |      |      |      |
|----------------------------------------|------------------------------------------------------------------------------------------------------------------------------------------------------------------------------------------------------------------------------------------------------------------------------------------------------------------------------------------------------------------------------------------------------------------------------------------------------------------------------------------------------------------------------------------------------------------------------------------------------------------------------------------------------------------------------------------------------------------------------------|-----------------------|-----------------|-----------------|------|------|--|--|--|--|----|------|----|------|----|-------------|----|---|---|----|----|----|----|---|----|----|----|----|----|----|----|----|----|----|----|----|----|----|----|----|----|----|----|----|----|----|-----|----|----|----|----|----|--------------------------------------------------------------------------------------------------------------------------------------------------------------------------------------------------------------------------------------------------------------------------------------------------------------------------------------------------------------------------------------------------------------------------------------------------------------------------------------------------------------------------------------------------------------------------------------------------------------------------------------------------------------------------------------------------------------------------------------------------------------------------------------------|--|--|-----------------|--|--|--|--|--|--|----|------|----|------|----|-------------|----|------|------|------|------|------|----|------|------|------|------|------|----|------|------|------|------|------|----|------|------|------|------|------|----|------|------|------|------|------|-----|------|------|------|------|------|
| Continuous Protocol<br>(48/48 hours)   | <p>ROUNDED Bags dialysate/pt/d</p> <table><tr><th colspan="2"></th><th colspan="5">Dose (mL/kg/hr)</th></tr><tr><th></th><th></th><th>15</th><th>17.5</th><th>20</th><th>22.5</th><th>25</th></tr><tr><th rowspan="6">Weight (kg)</th><th>50</th><td>4</td><td>4</td><td>5</td><td>5</td><td>6</td></tr><tr><th>60</th><td>4</td><td>5</td><td>6</td><td>6</td><td>7</td></tr><tr><th>70</th><td>5</td><td>6</td><td>7</td><td>8</td><td>8</td></tr><tr><th>80</th><td>6</td><td>7</td><td>8</td><td>9</td><td>10</td></tr><tr><th>90</th><td>7</td><td>8</td><td>9</td><td>10</td><td>11</td></tr><tr><th>100</th><td>8</td><td>9</td><td>10</td><td>11</td><td>12</td></tr></table>                                              |                       |                 | Dose (mL/kg/hr) |      |      |  |  |  |  | 15 | 17.5 | 20 | 22.5 | 25 | Weight (kg) | 50 | 4 | 4 | 5  | 5  | 6  | 60 | 4 | 5  | 6  | 6  | 7  | 70 | 5  | 6  | 7  | 8  | 8  | 80 | 6  | 7  | 8  | 9  | 10 | 90 | 7  | 8  | 9  | 10 | 11 | 100 | 8  | 9  | 10 | 11 | 12 | <p>ROUNDED Dialysate Flow Rate</p> <table><tr><th colspan="2"></th><th colspan="5">Dose (mL/kg/hr)</th></tr><tr><th></th><th></th><th>15</th><th>17.5</th><th>20</th><th>22.5</th><th>25</th></tr><tr><th rowspan="6">Weight (kg)</th><th>50</th><td>800</td><td>800</td><td>1000</td><td>1000</td><td>1200</td></tr><tr><th>60</th><td>800</td><td>1000</td><td>1200</td><td>1200</td><td>1400</td></tr><tr><th>70</th><td>1000</td><td>1200</td><td>1400</td><td>1600</td><td>1600</td></tr><tr><th>80</th><td>1200</td><td>1400</td><td>1600</td><td>1800</td><td>2000</td></tr><tr><th>90</th><td>1400</td><td>1600</td><td>1800</td><td>2000</td><td>2200</td></tr><tr><th>100</th><td>1600</td><td>1800</td><td>2000</td><td>2200</td><td>2500</td></tr></table>                     |  |  | Dose (mL/kg/hr) |  |  |  |  |  |  | 15 | 17.5 | 20 | 22.5 | 25 | Weight (kg) | 50 | 800  | 800  | 1000 | 1000 | 1200 | 60 | 800  | 1000 | 1200 | 1200 | 1400 | 70 | 1000 | 1200 | 1400 | 1600 | 1600 | 80 | 1200 | 1400 | 1600 | 1800 | 2000 | 90 | 1400 | 1600 | 1800 | 2000 | 2200 | 100 | 1600 | 1800 | 2000 | 2200 | 2500 |
|                                        |                                                                                                                                                                                                                                                                                                                                                                                                                                                                                                                                                                                                                                                                                                                                    |                       | Dose (mL/kg/hr) |                 |      |      |  |  |  |  |    |      |    |      |    |             |    |   |   |    |    |    |    |   |    |    |    |    |    |    |    |    |    |    |    |    |    |    |    |    |    |    |    |    |    |    |     |    |    |    |    |    |                                                                                                                                                                                                                                                                                                                                                                                                                                                                                                                                                                                                                                                                                                                                                                                            |  |  |                 |  |  |  |  |  |  |    |      |    |      |    |             |    |      |      |      |      |      |    |      |      |      |      |      |    |      |      |      |      |      |    |      |      |      |      |      |    |      |      |      |      |      |     |      |      |      |      |      |
|                                        |                                                                                                                                                                                                                                                                                                                                                                                                                                                                                                                                                                                                                                                                                                                                    | 15                    | 17.5            | 20              | 22.5 | 25   |  |  |  |  |    |      |    |      |    |             |    |   |   |    |    |    |    |   |    |    |    |    |    |    |    |    |    |    |    |    |    |    |    |    |    |    |    |    |    |    |     |    |    |    |    |    |                                                                                                                                                                                                                                                                                                                                                                                                                                                                                                                                                                                                                                                                                                                                                                                            |  |  |                 |  |  |  |  |  |  |    |      |    |      |    |             |    |      |      |      |      |      |    |      |      |      |      |      |    |      |      |      |      |      |    |      |      |      |      |      |    |      |      |      |      |      |     |      |      |      |      |      |
| Weight (kg)                            | 50                                                                                                                                                                                                                                                                                                                                                                                                                                                                                                                                                                                                                                                                                                                                 | 4                     | 4               | 5               | 5    | 6    |  |  |  |  |    |      |    |      |    |             |    |   |   |    |    |    |    |   |    |    |    |    |    |    |    |    |    |    |    |    |    |    |    |    |    |    |    |    |    |    |     |    |    |    |    |    |                                                                                                                                                                                                                                                                                                                                                                                                                                                                                                                                                                                                                                                                                                                                                                                            |  |  |                 |  |  |  |  |  |  |    |      |    |      |    |             |    |      |      |      |      |      |    |      |      |      |      |      |    |      |      |      |      |      |    |      |      |      |      |      |    |      |      |      |      |      |     |      |      |      |      |      |
|                                        | 60                                                                                                                                                                                                                                                                                                                                                                                                                                                                                                                                                                                                                                                                                                                                 | 4                     | 5               | 6               | 6    | 7    |  |  |  |  |    |      |    |      |    |             |    |   |   |    |    |    |    |   |    |    |    |    |    |    |    |    |    |    |    |    |    |    |    |    |    |    |    |    |    |    |     |    |    |    |    |    |                                                                                                                                                                                                                                                                                                                                                                                                                                                                                                                                                                                                                                                                                                                                                                                            |  |  |                 |  |  |  |  |  |  |    |      |    |      |    |             |    |      |      |      |      |      |    |      |      |      |      |      |    |      |      |      |      |      |    |      |      |      |      |      |    |      |      |      |      |      |     |      |      |      |      |      |
|                                        | 70                                                                                                                                                                                                                                                                                                                                                                                                                                                                                                                                                                                                                                                                                                                                 | 5                     | 6               | 7               | 8    | 8    |  |  |  |  |    |      |    |      |    |             |    |   |   |    |    |    |    |   |    |    |    |    |    |    |    |    |    |    |    |    |    |    |    |    |    |    |    |    |    |    |     |    |    |    |    |    |                                                                                                                                                                                                                                                                                                                                                                                                                                                                                                                                                                                                                                                                                                                                                                                            |  |  |                 |  |  |  |  |  |  |    |      |    |      |    |             |    |      |      |      |      |      |    |      |      |      |      |      |    |      |      |      |      |      |    |      |      |      |      |      |    |      |      |      |      |      |     |      |      |      |      |      |
|                                        | 80                                                                                                                                                                                                                                                                                                                                                                                                                                                                                                                                                                                                                                                                                                                                 | 6                     | 7               | 8               | 9    | 10   |  |  |  |  |    |      |    |      |    |             |    |   |   |    |    |    |    |   |    |    |    |    |    |    |    |    |    |    |    |    |    |    |    |    |    |    |    |    |    |    |     |    |    |    |    |    |                                                                                                                                                                                                                                                                                                                                                                                                                                                                                                                                                                                                                                                                                                                                                                                            |  |  |                 |  |  |  |  |  |  |    |      |    |      |    |             |    |      |      |      |      |      |    |      |      |      |      |      |    |      |      |      |      |      |    |      |      |      |      |      |    |      |      |      |      |      |     |      |      |      |      |      |
|                                        | 90                                                                                                                                                                                                                                                                                                                                                                                                                                                                                                                                                                                                                                                                                                                                 | 7                     | 8               | 9               | 10   | 11   |  |  |  |  |    |      |    |      |    |             |    |   |   |    |    |    |    |   |    |    |    |    |    |    |    |    |    |    |    |    |    |    |    |    |    |    |    |    |    |    |     |    |    |    |    |    |                                                                                                                                                                                                                                                                                                                                                                                                                                                                                                                                                                                                                                                                                                                                                                                            |  |  |                 |  |  |  |  |  |  |    |      |    |      |    |             |    |      |      |      |      |      |    |      |      |      |      |      |    |      |      |      |      |      |    |      |      |      |      |      |    |      |      |      |      |      |     |      |      |      |      |      |
|                                        | 100                                                                                                                                                                                                                                                                                                                                                                                                                                                                                                                                                                                                                                                                                                                                | 8                     | 9               | 10              | 11   | 12   |  |  |  |  |    |      |    |      |    |             |    |   |   |    |    |    |    |   |    |    |    |    |    |    |    |    |    |    |    |    |    |    |    |    |    |    |    |    |    |    |     |    |    |    |    |    |                                                                                                                                                                                                                                                                                                                                                                                                                                                                                                                                                                                                                                                                                                                                                                                            |  |  |                 |  |  |  |  |  |  |    |      |    |      |    |             |    |      |      |      |      |      |    |      |      |      |      |      |    |      |      |      |      |      |    |      |      |      |      |      |    |      |      |      |      |      |     |      |      |      |      |      |
|                                        |                                                                                                                                                                                                                                                                                                                                                                                                                                                                                                                                                                                                                                                                                                                                    | Dose (mL/kg/hr)       |                 |                 |      |      |  |  |  |  |    |      |    |      |    |             |    |   |   |    |    |    |    |   |    |    |    |    |    |    |    |    |    |    |    |    |    |    |    |    |    |    |    |    |    |    |     |    |    |    |    |    |                                                                                                                                                                                                                                                                                                                                                                                                                                                                                                                                                                                                                                                                                                                                                                                            |  |  |                 |  |  |  |  |  |  |    |      |    |      |    |             |    |      |      |      |      |      |    |      |      |      |      |      |    |      |      |      |      |      |    |      |      |      |      |      |    |      |      |      |      |      |     |      |      |      |      |      |
|                                        |                                                                                                                                                                                                                                                                                                                                                                                                                                                                                                                                                                                                                                                                                                                                    | 15                    | 17.5            | 20              | 22.5 | 25   |  |  |  |  |    |      |    |      |    |             |    |   |   |    |    |    |    |   |    |    |    |    |    |    |    |    |    |    |    |    |    |    |    |    |    |    |    |    |    |    |     |    |    |    |    |    |                                                                                                                                                                                                                                                                                                                                                                                                                                                                                                                                                                                                                                                                                                                                                                                            |  |  |                 |  |  |  |  |  |  |    |      |    |      |    |             |    |      |      |      |      |      |    |      |      |      |      |      |    |      |      |      |      |      |    |      |      |      |      |      |    |      |      |      |      |      |     |      |      |      |      |      |
| Weight (kg)                            | 50                                                                                                                                                                                                                                                                                                                                                                                                                                                                                                                                                                                                                                                                                                                                 | 800                   | 800             | 1000            | 1000 | 1200 |  |  |  |  |    |      |    |      |    |             |    |   |   |    |    |    |    |   |    |    |    |    |    |    |    |    |    |    |    |    |    |    |    |    |    |    |    |    |    |    |     |    |    |    |    |    |                                                                                                                                                                                                                                                                                                                                                                                                                                                                                                                                                                                                                                                                                                                                                                                            |  |  |                 |  |  |  |  |  |  |    |      |    |      |    |             |    |      |      |      |      |      |    |      |      |      |      |      |    |      |      |      |      |      |    |      |      |      |      |      |    |      |      |      |      |      |     |      |      |      |      |      |
|                                        | 60                                                                                                                                                                                                                                                                                                                                                                                                                                                                                                                                                                                                                                                                                                                                 | 800                   | 1000            | 1200            | 1200 | 1400 |  |  |  |  |    |      |    |      |    |             |    |   |   |    |    |    |    |   |    |    |    |    |    |    |    |    |    |    |    |    |    |    |    |    |    |    |    |    |    |    |     |    |    |    |    |    |                                                                                                                                                                                                                                                                                                                                                                                                                                                                                                                                                                                                                                                                                                                                                                                            |  |  |                 |  |  |  |  |  |  |    |      |    |      |    |             |    |      |      |      |      |      |    |      |      |      |      |      |    |      |      |      |      |      |    |      |      |      |      |      |    |      |      |      |      |      |     |      |      |      |      |      |
|                                        | 70                                                                                                                                                                                                                                                                                                                                                                                                                                                                                                                                                                                                                                                                                                                                 | 1000                  | 1200            | 1400            | 1600 | 1600 |  |  |  |  |    |      |    |      |    |             |    |   |   |    |    |    |    |   |    |    |    |    |    |    |    |    |    |    |    |    |    |    |    |    |    |    |    |    |    |    |     |    |    |    |    |    |                                                                                                                                                                                                                                                                                                                                                                                                                                                                                                                                                                                                                                                                                                                                                                                            |  |  |                 |  |  |  |  |  |  |    |      |    |      |    |             |    |      |      |      |      |      |    |      |      |      |      |      |    |      |      |      |      |      |    |      |      |      |      |      |    |      |      |      |      |      |     |      |      |      |      |      |
|                                        | 80                                                                                                                                                                                                                                                                                                                                                                                                                                                                                                                                                                                                                                                                                                                                 | 1200                  | 1400            | 1600            | 1800 | 2000 |  |  |  |  |    |      |    |      |    |             |    |   |   |    |    |    |    |   |    |    |    |    |    |    |    |    |    |    |    |    |    |    |    |    |    |    |    |    |    |    |     |    |    |    |    |    |                                                                                                                                                                                                                                                                                                                                                                                                                                                                                                                                                                                                                                                                                                                                                                                            |  |  |                 |  |  |  |  |  |  |    |      |    |      |    |             |    |      |      |      |      |      |    |      |      |      |      |      |    |      |      |      |      |      |    |      |      |      |      |      |    |      |      |      |      |      |     |      |      |      |      |      |
|                                        | 90                                                                                                                                                                                                                                                                                                                                                                                                                                                                                                                                                                                                                                                                                                                                 | 1400                  | 1600            | 1800            | 2000 | 2200 |  |  |  |  |    |      |    |      |    |             |    |   |   |    |    |    |    |   |    |    |    |    |    |    |    |    |    |    |    |    |    |    |    |    |    |    |    |    |    |    |     |    |    |    |    |    |                                                                                                                                                                                                                                                                                                                                                                                                                                                                                                                                                                                                                                                                                                                                                                                            |  |  |                 |  |  |  |  |  |  |    |      |    |      |    |             |    |      |      |      |      |      |    |      |      |      |      |      |    |      |      |      |      |      |    |      |      |      |      |      |    |      |      |      |      |      |     |      |      |      |      |      |
|                                        | 100                                                                                                                                                                                                                                                                                                                                                                                                                                                                                                                                                                                                                                                                                                                                | 1600                  | 1800            | 2000            | 2200 | 2500 |  |  |  |  |    |      |    |      |    |             |    |   |   |    |    |    |    |   |    |    |    |    |    |    |    |    |    |    |    |    |    |    |    |    |    |    |    |    |    |    |     |    |    |    |    |    |                                                                                                                                                                                                                                                                                                                                                                                                                                                                                                                                                                                                                                                                                                                                                                                            |  |  |                 |  |  |  |  |  |  |    |      |    |      |    |             |    |      |      |      |      |      |    |      |      |      |      |      |    |      |      |      |      |      |    |      |      |      |      |      |    |      |      |      |      |      |     |      |      |      |      |      |
| Shared PIRRT Protocol<br>(22/48 hours) | <p>ROUNDED Bags dialysate/pt/22 hours (PIRRT Protocol)</p> <table><tr><th colspan="2"></th><th colspan="5">Dose (mL/kg/hr)</th></tr><tr><th></th><th></th><th>15</th><th>17.5</th><th>20</th><th>22.5</th><th>25</th></tr><tr><th rowspan="6">Weight (kg)</th><th>50</th><td>8</td><td>9</td><td>11</td><td>12</td><td>13</td></tr><tr><th>60</th><td>9</td><td>11</td><td>13</td><td>14</td><td>15</td></tr><tr><th>70</th><td>11</td><td>13</td><td>15</td><td>16</td><td>18</td></tr><tr><th>80</th><td>13</td><td>15</td><td>17</td><td>19</td><td>21</td></tr><tr><th>90</th><td>14</td><td>17</td><td>19</td><td>21</td><td>24</td></tr><tr><th>100</th><td>16</td><td>18</td><td>21</td><td>24</td><td>26</td></tr></table> |                       |                 | Dose (mL/kg/hr) |      |      |  |  |  |  | 15 | 17.5 | 20 | 22.5 | 25 | Weight (kg) | 50 | 8 | 9 | 11 | 12 | 13 | 60 | 9 | 11 | 13 | 14 | 15 | 70 | 11 | 13 | 15 | 16 | 18 | 80 | 13 | 15 | 17 | 19 | 21 | 90 | 14 | 17 | 19 | 21 | 24 | 100 | 16 | 18 | 21 | 24 | 26 | <p>ROUNDED Dialysate Flow Rate (PIRRT Protocol)</p> <table><tr><th colspan="2"></th><th colspan="5">Dose (mL/kg/hr)</th></tr><tr><th></th><th></th><th>15</th><th>17.5</th><th>20</th><th>22.5</th><th>25</th></tr><tr><th rowspan="6">Weight (kg)</th><th>50</th><td>1800</td><td>2000</td><td>2500</td><td>2700</td><td>2900</td></tr><tr><th>60</th><td>2000</td><td>2500</td><td>2900</td><td>3100</td><td>3400</td></tr><tr><th>70</th><td>2500</td><td>2900</td><td>3400</td><td>3600</td><td>4000</td></tr><tr><th>80</th><td>2900</td><td>3400</td><td>3800</td><td>4300</td><td>4700</td></tr><tr><th>90</th><td>3100</td><td>3800</td><td>4300</td><td>4700</td><td>5400</td></tr><tr><th>100</th><td>3600</td><td>4000</td><td>4700</td><td>5400</td><td>5900</td></tr></table> |  |  | Dose (mL/kg/hr) |  |  |  |  |  |  | 15 | 17.5 | 20 | 22.5 | 25 | Weight (kg) | 50 | 1800 | 2000 | 2500 | 2700 | 2900 | 60 | 2000 | 2500 | 2900 | 3100 | 3400 | 70 | 2500 | 2900 | 3400 | 3600 | 4000 | 80 | 2900 | 3400 | 3800 | 4300 | 4700 | 90 | 3100 | 3800 | 4300 | 4700 | 5400 | 100 | 3600 | 4000 | 4700 | 5400 | 5900 |
|                                        |                                                                                                                                                                                                                                                                                                                                                                                                                                                                                                                                                                                                                                                                                                                                    |                       | Dose (mL/kg/hr) |                 |      |      |  |  |  |  |    |      |    |      |    |             |    |   |   |    |    |    |    |   |    |    |    |    |    |    |    |    |    |    |    |    |    |    |    |    |    |    |    |    |    |    |     |    |    |    |    |    |                                                                                                                                                                                                                                                                                                                                                                                                                                                                                                                                                                                                                                                                                                                                                                                            |  |  |                 |  |  |  |  |  |  |    |      |    |      |    |             |    |      |      |      |      |      |    |      |      |      |      |      |    |      |      |      |      |      |    |      |      |      |      |      |    |      |      |      |      |      |     |      |      |      |      |      |
|                                        |                                                                                                                                                                                                                                                                                                                                                                                                                                                                                                                                                                                                                                                                                                                                    | 15                    | 17.5            | 20              | 22.5 | 25   |  |  |  |  |    |      |    |      |    |             |    |   |   |    |    |    |    |   |    |    |    |    |    |    |    |    |    |    |    |    |    |    |    |    |    |    |    |    |    |    |     |    |    |    |    |    |                                                                                                                                                                                                                                                                                                                                                                                                                                                                                                                                                                                                                                                                                                                                                                                            |  |  |                 |  |  |  |  |  |  |    |      |    |      |    |             |    |      |      |      |      |      |    |      |      |      |      |      |    |      |      |      |      |      |    |      |      |      |      |      |    |      |      |      |      |      |     |      |      |      |      |      |
| Weight (kg)                            | 50                                                                                                                                                                                                                                                                                                                                                                                                                                                                                                                                                                                                                                                                                                                                 | 8                     | 9               | 11              | 12   | 13   |  |  |  |  |    |      |    |      |    |             |    |   |   |    |    |    |    |   |    |    |    |    |    |    |    |    |    |    |    |    |    |    |    |    |    |    |    |    |    |    |     |    |    |    |    |    |                                                                                                                                                                                                                                                                                                                                                                                                                                                                                                                                                                                                                                                                                                                                                                                            |  |  |                 |  |  |  |  |  |  |    |      |    |      |    |             |    |      |      |      |      |      |    |      |      |      |      |      |    |      |      |      |      |      |    |      |      |      |      |      |    |      |      |      |      |      |     |      |      |      |      |      |
|                                        | 60                                                                                                                                                                                                                                                                                                                                                                                                                                                                                                                                                                                                                                                                                                                                 | 9                     | 11              | 13              | 14   | 15   |  |  |  |  |    |      |    |      |    |             |    |   |   |    |    |    |    |   |    |    |    |    |    |    |    |    |    |    |    |    |    |    |    |    |    |    |    |    |    |    |     |    |    |    |    |    |                                                                                                                                                                                                                                                                                                                                                                                                                                                                                                                                                                                                                                                                                                                                                                                            |  |  |                 |  |  |  |  |  |  |    |      |    |      |    |             |    |      |      |      |      |      |    |      |      |      |      |      |    |      |      |      |      |      |    |      |      |      |      |      |    |      |      |      |      |      |     |      |      |      |      |      |
|                                        | 70                                                                                                                                                                                                                                                                                                                                                                                                                                                                                                                                                                                                                                                                                                                                 | 11                    | 13              | 15              | 16   | 18   |  |  |  |  |    |      |    |      |    |             |    |   |   |    |    |    |    |   |    |    |    |    |    |    |    |    |    |    |    |    |    |    |    |    |    |    |    |    |    |    |     |    |    |    |    |    |                                                                                                                                                                                                                                                                                                                                                                                                                                                                                                                                                                                                                                                                                                                                                                                            |  |  |                 |  |  |  |  |  |  |    |      |    |      |    |             |    |      |      |      |      |      |    |      |      |      |      |      |    |      |      |      |      |      |    |      |      |      |      |      |    |      |      |      |      |      |     |      |      |      |      |      |
|                                        | 80                                                                                                                                                                                                                                                                                                                                                                                                                                                                                                                                                                                                                                                                                                                                 | 13                    | 15              | 17              | 19   | 21   |  |  |  |  |    |      |    |      |    |             |    |   |   |    |    |    |    |   |    |    |    |    |    |    |    |    |    |    |    |    |    |    |    |    |    |    |    |    |    |    |     |    |    |    |    |    |                                                                                                                                                                                                                                                                                                                                                                                                                                                                                                                                                                                                                                                                                                                                                                                            |  |  |                 |  |  |  |  |  |  |    |      |    |      |    |             |    |      |      |      |      |      |    |      |      |      |      |      |    |      |      |      |      |      |    |      |      |      |      |      |    |      |      |      |      |      |     |      |      |      |      |      |
|                                        | 90                                                                                                                                                                                                                                                                                                                                                                                                                                                                                                                                                                                                                                                                                                                                 | 14                    | 17              | 19              | 21   | 24   |  |  |  |  |    |      |    |      |    |             |    |   |   |    |    |    |    |   |    |    |    |    |    |    |    |    |    |    |    |    |    |    |    |    |    |    |    |    |    |    |     |    |    |    |    |    |                                                                                                                                                                                                                                                                                                                                                                                                                                                                                                                                                                                                                                                                                                                                                                                            |  |  |                 |  |  |  |  |  |  |    |      |    |      |    |             |    |      |      |      |      |      |    |      |      |      |      |      |    |      |      |      |      |      |    |      |      |      |      |      |    |      |      |      |      |      |     |      |      |      |      |      |
|                                        | 100                                                                                                                                                                                                                                                                                                                                                                                                                                                                                                                                                                                                                                                                                                                                | 16                    | 18              | 21              | 24   | 26   |  |  |  |  |    |      |    |      |    |             |    |   |   |    |    |    |    |   |    |    |    |    |    |    |    |    |    |    |    |    |    |    |    |    |    |    |    |    |    |    |     |    |    |    |    |    |                                                                                                                                                                                                                                                                                                                                                                                                                                                                                                                                                                                                                                                                                                                                                                                            |  |  |                 |  |  |  |  |  |  |    |      |    |      |    |             |    |      |      |      |      |      |    |      |      |      |      |      |    |      |      |      |      |      |    |      |      |      |      |      |    |      |      |      |      |      |     |      |      |      |      |      |
|                                        |                                                                                                                                                                                                                                                                                                                                                                                                                                                                                                                                                                                                                                                                                                                                    | Dose (mL/kg/hr)       |                 |                 |      |      |  |  |  |  |    |      |    |      |    |             |    |   |   |    |    |    |    |   |    |    |    |    |    |    |    |    |    |    |    |    |    |    |    |    |    |    |    |    |    |    |     |    |    |    |    |    |                                                                                                                                                                                                                                                                                                                                                                                                                                                                                                                                                                                                                                                                                                                                                                                            |  |  |                 |  |  |  |  |  |  |    |      |    |      |    |             |    |      |      |      |      |      |    |      |      |      |      |      |    |      |      |      |      |      |    |      |      |      |      |      |    |      |      |      |      |      |     |      |      |      |      |      |
|                                        |                                                                                                                                                                                                                                                                                                                                                                                                                                                                                                                                                                                                                                                                                                                                    | 15                    | 17.5            | 20              | 22.5 | 25   |  |  |  |  |    |      |    |      |    |             |    |   |   |    |    |    |    |   |    |    |    |    |    |    |    |    |    |    |    |    |    |    |    |    |    |    |    |    |    |    |     |    |    |    |    |    |                                                                                                                                                                                                                                                                                                                                                                                                                                                                                                                                                                                                                                                                                                                                                                                            |  |  |                 |  |  |  |  |  |  |    |      |    |      |    |             |    |      |      |      |      |      |    |      |      |      |      |      |    |      |      |      |      |      |    |      |      |      |      |      |    |      |      |      |      |      |     |      |      |      |      |      |
| Weight (kg)                            | 50                                                                                                                                                                                                                                                                                                                                                                                                                                                                                                                                                                                                                                                                                                                                 | 1800                  | 2000            | 2500            | 2700 | 2900 |  |  |  |  |    |      |    |      |    |             |    |   |   |    |    |    |    |   |    |    |    |    |    |    |    |    |    |    |    |    |    |    |    |    |    |    |    |    |    |    |     |    |    |    |    |    |                                                                                                                                                                                                                                                                                                                                                                                                                                                                                                                                                                                                                                                                                                                                                                                            |  |  |                 |  |  |  |  |  |  |    |      |    |      |    |             |    |      |      |      |      |      |    |      |      |      |      |      |    |      |      |      |      |      |    |      |      |      |      |      |    |      |      |      |      |      |     |      |      |      |      |      |
|                                        | 60                                                                                                                                                                                                                                                                                                                                                                                                                                                                                                                                                                                                                                                                                                                                 | 2000                  | 2500            | 2900            | 3100 | 3400 |  |  |  |  |    |      |    |      |    |             |    |   |   |    |    |    |    |   |    |    |    |    |    |    |    |    |    |    |    |    |    |    |    |    |    |    |    |    |    |    |     |    |    |    |    |    |                                                                                                                                                                                                                                                                                                                                                                                                                                                                                                                                                                                                                                                                                                                                                                                            |  |  |                 |  |  |  |  |  |  |    |      |    |      |    |             |    |      |      |      |      |      |    |      |      |      |      |      |    |      |      |      |      |      |    |      |      |      |      |      |    |      |      |      |      |      |     |      |      |      |      |      |
|                                        | 70                                                                                                                                                                                                                                                                                                                                                                                                                                                                                                                                                                                                                                                                                                                                 | 2500                  | 2900            | 3400            | 3600 | 4000 |  |  |  |  |    |      |    |      |    |             |    |   |   |    |    |    |    |   |    |    |    |    |    |    |    |    |    |    |    |    |    |    |    |    |    |    |    |    |    |    |     |    |    |    |    |    |                                                                                                                                                                                                                                                                                                                                                                                                                                                                                                                                                                                                                                                                                                                                                                                            |  |  |                 |  |  |  |  |  |  |    |      |    |      |    |             |    |      |      |      |      |      |    |      |      |      |      |      |    |      |      |      |      |      |    |      |      |      |      |      |    |      |      |      |      |      |     |      |      |      |      |      |
|                                        | 80                                                                                                                                                                                                                                                                                                                                                                                                                                                                                                                                                                                                                                                                                                                                 | 2900                  | 3400            | 3800            | 4300 | 4700 |  |  |  |  |    |      |    |      |    |             |    |   |   |    |    |    |    |   |    |    |    |    |    |    |    |    |    |    |    |    |    |    |    |    |    |    |    |    |    |    |     |    |    |    |    |    |                                                                                                                                                                                                                                                                                                                                                                                                                                                                                                                                                                                                                                                                                                                                                                                            |  |  |                 |  |  |  |  |  |  |    |      |    |      |    |             |    |      |      |      |      |      |    |      |      |      |      |      |    |      |      |      |      |      |    |      |      |      |      |      |    |      |      |      |      |      |     |      |      |      |      |      |
|                                        | 90                                                                                                                                                                                                                                                                                                                                                                                                                                                                                                                                                                                                                                                                                                                                 | 3100                  | 3800            | 4300            | 4700 | 5400 |  |  |  |  |    |      |    |      |    |             |    |   |   |    |    |    |    |   |    |    |    |    |    |    |    |    |    |    |    |    |    |    |    |    |    |    |    |    |    |    |     |    |    |    |    |    |                                                                                                                                                                                                                                                                                                                                                                                                                                                                                                                                                                                                                                                                                                                                                                                            |  |  |                 |  |  |  |  |  |  |    |      |    |      |    |             |    |      |      |      |      |      |    |      |      |      |      |      |    |      |      |      |      |      |    |      |      |      |      |      |    |      |      |      |      |      |     |      |      |      |      |      |
|                                        | 100                                                                                                                                                                                                                                                                                                                                                                                                                                                                                                                                                                                                                                                                                                                                | 3600                  | 4000            | 4700            | 5400 | 5900 |  |  |  |  |    |      |    |      |    |             |    |   |   |    |    |    |    |   |    |    |    |    |    |    |    |    |    |    |    |    |    |    |    |    |    |    |    |    |    |    |     |    |    |    |    |    |                                                                                                                                                                                                                                                                                                                                                                                                                                                                                                                                                                                                                                                                                                                                                                                            |  |  |                 |  |  |  |  |  |  |    |      |    |      |    |             |    |      |      |      |      |      |    |      |      |      |      |      |    |      |      |      |      |      |    |      |      |      |      |      |    |      |      |      |      |      |     |      |      |      |      |      |
